# Supplementary material
Source: publisher site journal article supplement (https://www.dovepress.com/article/287386)
Supplement: Supplementary file 1 [file get_supplementary_file.php]

# Long non-coding RNA CAR10 facilitates non-small cell lung cancer cell metastasis by modulating the miR-892a/GJB2 pathway

Shanshan Li, Yize Liu, Guanzhen Qiu, Yinzhou Luo, Lan Luan, Tiance Xu, Yong Wang and Shuyue Xia

## Supplementary Figure 1

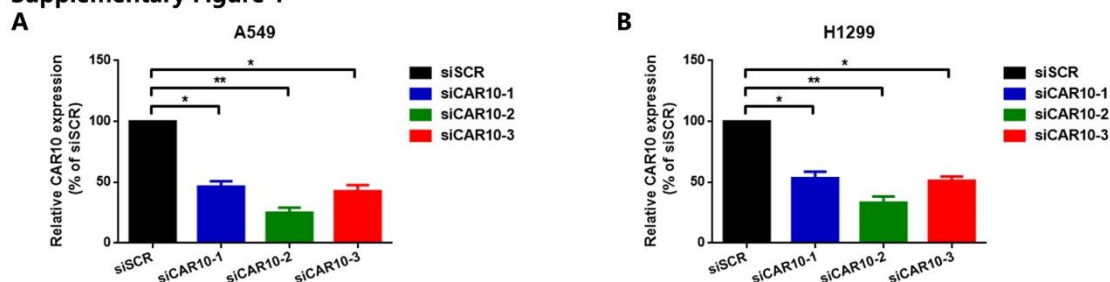

Supplementary figure 1. Three specific small interfering RNAs that targeting CAR10 were transfected into (A) A549 and (B) H1299 cells, and the expression of CAR10 was determined by reverse transcription-quantitative PCR. \* $P < 0.05$  and \*\* $P < 0.01$ . Data are presented as the mean  $\pm$  SD from three independent experiments. CAR10, chromatin-associated RNA *Intergenic 10*.

## Supplementary Figure 2

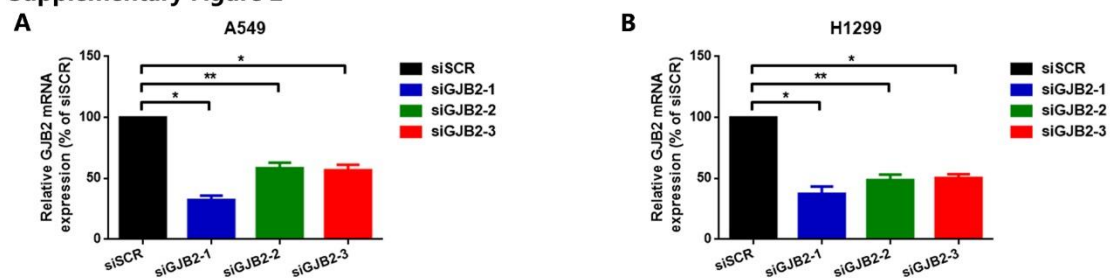

Supplementary figure 2. Three specific small interfering RNAs that targeted GJB2 were transfected into (A) A549 and (B) H1299 cells, and the expression of GJB2 was determined by reverse transcription-quantitative PCR. \* $P < 0.05$  and \*\* $P < 0.01$ . Data are presented as the mean  $\pm$  SD from three independent experiments. GJB2, gap junction protein beta 2.

### Supplementary figure 3

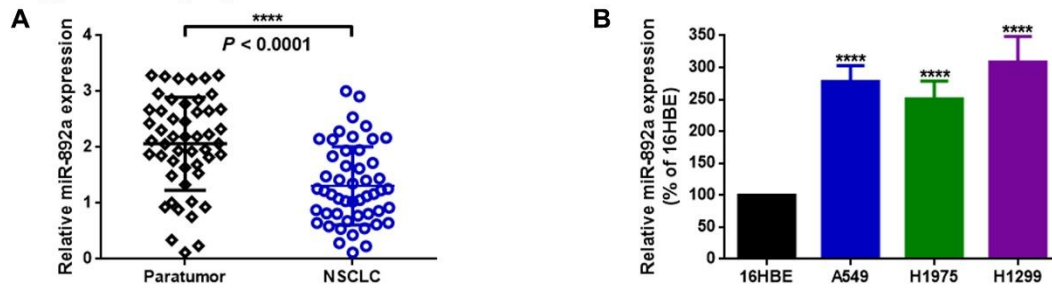

Supplementary figure 3. The expression of miR-892a in NSCLC tissue samples (A) and in NSCLC cell lines (B) were measured by reverse transcription-quantitative PCR.

\*\*\*\* $P < 0.0001$ . Data are presented as the mean  $\pm$ SD from three independent experiments.

Supplementary table I. Overlapping differentially expressed genes in dataset GSE19188.

---

8 overlapped DEGs in GSE19188

---

| ID          | adj.P.Val | P.Value  | t         | B        | logFC     | Gene.symbol | Gene.title                             |
|-------------|-----------|----------|-----------|----------|-----------|-------------|----------------------------------------|
| 1552766_at  | 0.119755  | 7.92E-03 | 3.149121  | -2.57208 | 4.3473223 | HS6ST2      | heparan sulfate 6-O-sulfotransferase 2 |
| 37892_at    | 0.081704  | 3.57E-03 | 3.5699237 | -1.80935 | 4.0197917 | COL11A1     | collagen type XI alpha 1 chain         |
| 209125_at   | 0.030674  | 5.18E-04 | 4.6170278 | 0.04734  | 3.6339387 | KRT6A       | keratin 6A                             |
| 209875_s_at | 0.068119  | 2.51E-03 | 3.757594  | -1.47018 | 3.6184956 | SPP1        | secreted phosphoprotein 1              |
| 203889_at   | 0.092009  | 4.61E-03 | 3.4345128 | -2.05478 | 3.1717812 | SCG5        | secretogranin V                        |
| 204580_at   | 0.109227  | 6.56E-03 | 3.2483354 | -2.39242 | 3.0672376 | MMP12       | matrix metalloproteinase 12            |
| 223278_at   | 0.034965  | 6.82E-04 | 4.4643512 | -0.21649 | 3.064814  | GJB2        | gap junction protein beta 2            |
| 203878_s_at | 0.19935   | 2.28E-02 | 2.5908403 | -3.56841 | 2.4589426 | MMP11       | matrix metalloproteinase 11            |

---

Supplementary table II. Overlapping differentially expressed genes in dataset GSE30219.

| 8 overlapped DEGs in GSE30219 |           |          |           |          |           |             |                                        |
|-------------------------------|-----------|----------|-----------|----------|-----------|-------------|----------------------------------------|
| ID                            | adj.P.Val | P.Value  | t         | B        | logFC     | Gene.symbol | Gene.title                             |
| 204580_at                     | 9.37E-14  | 1.41E-15 | 8.6166523 | 24.78038 | 4.7341592 | MMP12       | matrix metalloproteinase 12            |
| 204475_at                     | 3.57E-08  | 1.76E-09 | 6.2848818 | 11.05461 | 3.990671  | MMP1        | matrix metalloproteinase 1             |
| 209875_s_at                   | 3.28E-17  | 2.71E-19 | 9.8909501 | 33.18718 | 3.8799062 | SPP1        | secreted phosphoprotein 1              |
| 37892_at                      | 7.50E-07  | 5.29E-08 | 5.6381259 | 7.755252 | 3.1579413 | COL11A1     | collagen type XI alpha 1 chain         |
| 230030_at                     | 4.57E-08  | 2.32E-09 | 6.2344825 | 10.78841 | 2.9634373 | HS6ST2      | heparan sulfate 6-O-sulfotransferase 2 |
| 223278_at                     | 1.79E-04  | 2.63E-05 | 4.295339  | 1.797876 | 2.8480633 | GJB2        | gap junction protein beta 2            |
| 209125_at                     | 3.18E-02  | 1.21E-02 | 2.5316507 | -3.87842 | 2.6499132 | KRT6A       | keratin 6A                             |
| 203889_at                     | 2.64E-06  | 2.20E-07 | 5.3520754 | 6.380573 | 2.5150231 | SCG5        | secretogranin V                        |

Supplementary table III. Overlapping differentially expressed genes in dataset GSE118370.

---

8 overlapped DEGs in GSE118370

---

| ID          | adj.P.Val | P.Value  | t         | B        | logFC     | Gene.symbol | Gene.title                             |
|-------------|-----------|----------|-----------|----------|-----------|-------------|----------------------------------------|
| 1552766_at  | 0.119755  | 7.92E-03 | 3.149121  | -2.57208 | 4.3473223 | HS6ST2      | heparan sulfate 6-O-sulfotransferase 2 |
| 37892_at    | 0.081704  | 3.57E-03 | 3.5699237 | -1.80935 | 4.0197917 | COL11A1     | collagen type XI alpha 1 chain         |
| 204475_at   | 0.042965  | 1.01E-03 | 4.2492089 | -0.59298 | 3.857191  | MMP1        | matrix metalloproteinase 1             |
| 209125_at   | 0.030674  | 5.18E-04 | 4.6170278 | 0.04734  | 3.6339387 | KRT6A       | keratin 6A                             |
| 209875_s_at | 0.068119  | 2.51E-03 | 3.757594  | -1.47018 | 3.6184956 | SPP1        | secreted phosphoprotein 1              |
| 203889_at   | 0.092009  | 4.61E-03 | 3.4345128 | -2.05478 | 3.1717812 | SCG5        | secretogranin V                        |
| 204580_at   | 0.109227  | 6.56E-03 | 3.2483354 | -2.39242 | 3.0672376 | MMP12       | matrix metalloproteinase 12            |
| 223278_at   | 0.034965  | 6.82E-04 | 4.4643512 | -0.21649 | 3.064814  | GJB2        | gap junction protein beta 2            |

---
